# Supplementary material for: Severe Back Pain in a Young Patient with Pyoderma Gangrenosum and Crohn’s Disease Controlled with Anti-tumor Necrosis Factor Therapy: Sterile Osteomyelitis
Source: Springer Nature journal article supplement (doi:10.1007/s13555-014-0044-3), 2014-02-04
Supplement: MOESM1 [file 9271012]

- Neutrophilic disorders may co-exist with inflammatory bowel disease (IBD).
- Chronic recurrent multi-focal osteomyelitis (CRMO) is a relatively new entity describing non-infectious osteomyelitis in association with neutrophilic disorders and IBD.
- Accurate diagnosis and prompt treatment with immunosuppressive drugs as opposed to antibiotics lead to cessation of symptoms

This summary slide represents the opinions of the authors. For a full list of acknowledgments and conflicts of interest for all authors of this article, please see the full text online. Copyright © The Authors 2014. Creative Commons Attribution Noncommercial License (CC BY-NC).
